# Supplementary material for: Impaired Antibody Response Is Associated with Histone-Release, Organ Dysfunction and Mortality in Critically Ill COVID-19 Patients
Source: MDPI journal article supplement (doi:10.3390/jcm11123419), 2022-06-14
Supplement: s1 [file s1]

## Supplementary material:

### *Methods*

#### *Cytokine analyses*

The initial plasma sample obtained at the ICU for each patient was analyzed for 27 biomarkers with Bio-plex assay using a Luminex MagPix instrument (Bio-Rad Laboratories, Sundbyberg, Sweden) as listed: Interleukin (IL)-1 $\beta$ , IL-2, IL-4 to IL-10, IL-12, IL-13, IL-15, IL-17A, interferon gamma (IFN  $\gamma$ ), interferon gamma-induced protein 10 (IP-10), monocyte chemotactic protein 1 (MCP-1, CCL2), macrophage inflammatory protein 1 alpha (MIP-1 $\alpha$ ), macrophage inflammatory protein 1 beta (MIP-1 $\beta$ ), tumor necrosis factor (TNF), IL-1 receptor antagonist (IL-1ra), Regulated on Activation, Normal T Cell Expressed and Secreted (RANTES), Platelet-derived growth factor BB (PDGF-bb), Basic fibroblast growth factor (FGF), Granulocyte colony-stimulating factor (GM-CSF), Granulocyte-macrophage colony-stimulating factor (GM-CSF), Vascular Endothelial Growth Factor (VEGF), and eotaxin.

#### *Complement analyses*

Complement tests were performed as previously described.[1] In brief, concentrations of C3, C4, and factor B were quantified by nephelometry. The activation products C3a and sC5b9 were determined by ELISA using neoepitope-specific antibodies for capture. C3a by ELISA using monoclonal antibody (mAb) 4SD17.3 for capture and biotinylated polyclonal anti-C3a for detection and sC5b-9 by an in-house ELISA using anti-human neo-C9 mAb aE11 for capture and polyclonal anti-C5 for detection. C3d was analyzed by nephelometry after removal of high molecular weight forms of C3 by PEG precipitation.

## Results

### COMPLEMENT TESTS

#### COMPLEMENT FACTORS

| Analyte                    | IgM                 |                     |         | IgG                 |                     |         | IgA                 |                     |         |
|----------------------------|---------------------|---------------------|---------|---------------------|---------------------|---------|---------------------|---------------------|---------|
|                            | Pos<br>n =103       | Neg<br>n = 12       | P value | Pos<br>n = 98       | Neg<br>n = 17       | P value | Pos<br>n =96        | Neg<br>n = 19       | P value |
| C4 (g/L) (0.13-0.32)       | 0.28<br>(0.20-0.40) | 0.28<br>(0.23-0.41) | 0.94    | 0.28<br>(0.21-0.41) | 0.25<br>(0.18-0.30) | 0.12    | 0.32<br>(0.21-0.41) | 0.25<br>(0.19-0.29) | 0.12    |
| C3 (g/L) (0.67-1.29)       | 1.24<br>(0.97-1.46) | 1.17<br>(0.88-1.54) | 0.71    | 1.26<br>(0.98-1.47) | 0.95<br>(0.88-1.20) | 0.010   | 1.25<br>(0.98-1.48) | 0.99<br>(0.84-1.28) | 0.10    |
| Factor B (g/L) (0.19-0.50) | 0.56<br>(0.45-0.67) | 0.56<br>(0.38-0.66) | 0.38    | 0.57<br>(0.48-0.69) | 0.42<br>(0.36-0.60) | 0.006   | 0.58<br>(0.47-0.69) | 0.43<br>(0.35-0.61) | 0.006   |

#### COMPLEMENT ACTIVATION PRODUCTS

|                     |                  |                  |      |                  |                  |      |                  |                  |      |
|---------------------|------------------|------------------|------|------------------|------------------|------|------------------|------------------|------|
| C3a (ng/L) (< 200)  | 253<br>(174-407) | 276<br>(160-888) | 0.56 | 264<br>(173-429) | 261<br>(160-319) | 0.85 | 279<br>(175-437) | 218<br>(159-273) | 0.38 |
| C3d (mg/L) (< 5.3)  | 7.0<br>(6.0-8.6) | 7.6<br>(5.0-7.7) | 0.68 | 7.1<br>(6.1-8.5) | 7.5<br>(5.1-8.6) | 0.63 | 7.2<br>(6.1-8.9) | 6.6<br>(4.7-7.9) | 0.20 |
| sC5b9 (µg/L) (< 50) | 145<br>(103-214) | 138<br>(64-213)  | 0.48 | 154<br>(104-214) | 109<br>(71-142)  | 0.11 | 162<br>(103-215) | 119<br>(84-140)  | 0.10 |

Data are expressed as median (interquartile range, IQR). Statistically significant differences between groups marked in red. Antibody pos: Antibody positive before ICU discharge.

| CLINICAL CHEMISTRY TESTS                |                     |                     |         |                     |                     |         |                     |                     |         |
|-----------------------------------------|---------------------|---------------------|---------|---------------------|---------------------|---------|---------------------|---------------------|---------|
| ICU entry values and peak values        |                     |                     |         |                     |                     |         |                     |                     |         |
| Analyte                                 | IgM                 |                     |         | IgG                 |                     |         | IgA                 |                     |         |
|                                         | Pos<br>n =103       | Neg<br>n = 12       | P value | Pos<br>n = 98       | Neg<br>n = 17       | P value | Pos<br>n =96        | Neg<br>n = 19       | P value |
| INFLAMMATION / COAGULATION              |                     |                     |         |                     |                     |         |                     |                     |         |
| CRP day 1<br>(mg/L)                     | 170<br>(118-237)    | 125<br>(63-199)     | 0.061   | 176<br>(120-237)    | 125<br>(63-165)     | 0.012   | 171<br>(118-237)    | 140<br>(64-195)     | 0.11    |
| CRP peak value<br>(mg/L)                | 286<br>(190-359)    | 270<br>(126-363)    | 0.58    | 290<br>(208-375)    | 193<br>(121-316)    | 0.018   | 287<br>(194-377)    | 233<br>(174-320)    | 0.14    |
| IL-6 day 1<br>(ng/L)                    | 115<br>(70-197)     | 86<br>(32-123)      | 0.099   | 115<br>(69-191)     | 87<br>(54-207)      | 0.52    | 118<br>(69-192)     | 87<br>(60-211)      | 0.47    |
| IL-6 peak value<br>(ng/L)               | 166<br>(83-324)     | 244<br>(86-276)     | 0.76    | 171<br>(85-341)     | 157<br>(74-276)     | 0.71    | 171<br>(86-304)     | 157<br>(77-290)     | 0.94    |
| Fibrin, D-dimer<br>day 1 (mg/L)         | 1.4<br>(0.9-2.2)    | 1.4<br>(0.5-2.8)    | 0.72    | 1.4<br>(0.9-2.2)    | 1.0<br>(0.6-2.8)    | 0.21    | 1.4<br>(0.9-2.3)    | 1.2<br>(0.7-2.3)    | 0.47    |
| Fibrin, D-dimer<br>peak value (mg/L)    | 3.3<br>(1.7-8.1)    | 3.7<br>(2.8-5.5)    | 0.47    | 3.4<br>(1.8-8.4)    | 2.6<br>(1.1-3.9)    | 0.071   | 3.4<br>(1.8-8.7)    | 2.8<br>(1.5-4.4)    | 0.19    |
| Platelet count day 1<br>(*109/L)        | 215<br>(159-283)    | 154<br>(96-218)     | 0.090   | 212<br>(164-283)    | 154<br>(97-264)     | 0.084   | 205<br>(165-281)    | 156<br>(117-276)    | 0.25    |
| Platelet count peak<br>value (*109/L)   | 458<br>(337-646)    | 331<br>(109-527)    | 0.034   | 468<br>(345-648)    | 298<br>(160-434)    | 0.001   | 468<br>(353-650)    | 321<br>(171-448)    | 0.002   |
| Platelet count min<br>value (*109/L)    | 194<br>(145-255)    | 153<br>(87-205)     | 0.15    | 196<br>(150-250)    | 150<br>(97-247)     | 0.12    | 193<br>(149-247)    | 156<br>(109-268)    | 0.43    |
| Lymphocyte count<br>day 1 (*109/L)      | 0.90<br>(0.79-1.20) | 1.20<br>(0.78-1.94) | 0.20    | 0.90<br>(0.80-1.20) | 1.05<br>(0.63-1.54) | 0.62    | 0.95<br>(0.80-1.20) | 0.95<br>(0.49-1.44) | 0.76    |
| Lymphocyte count<br>peak value (*109/L) | 1.70<br>(1.20-2.40) | 2.20<br>(0.60-2.40) | 0.91    | 1.80<br>(1.20-2.50) | 1.30<br>(0.70-2.28) | 0.054   | 1.80<br>(1.28-2.43) | 1.30<br>(0.65-2.35) | 0.10    |
| Lymphocyte count<br>min value (*109/L)  | 0.80<br>(0.60-1.08) | 0.70<br>(0.50-1.30) | 0.88    | 0.80<br>(0.60-1.10) | 0.70<br>(0.53-1.08) | 0.79    | 0.80<br>(0.60-1.10) | 0.70<br>(0.45-1.40) | 0.77    |

# ORGAN DAMAGE BIOMARKERS

| Analyte                           | IgM                 |                     |         | IgG                 |                     |         | IgA                 |                     |         |
|-----------------------------------|---------------------|---------------------|---------|---------------------|---------------------|---------|---------------------|---------------------|---------|
|                                   | Pos<br>n =103       | Neg<br>n = 12       | P value | Pos<br>n = 98       | Neg<br>n = 17       | P value | Pos<br>n =96        | Neg<br>n = 19       | P value |
| Creatinine day 1<br>(μmol/L)      | 79<br>(62-94)       | 98<br>(83-113)      | 0.034   | 79<br>(62-94)       | 101<br>(78-116)     | 0.017   | 79<br>(62-94)       | 105<br>(67-117)     | 0.011   |
| Creatinine peak<br>value (μmol/L) | 95<br>(73-153)      | 115<br>(98-172)     | 0.11    | 95<br>(73-163)      | 110<br>(96-132)     | 0.36    | 96<br>(76-156)      | 110<br>(94-173)     | 0.48    |
| Cystatin C day 1<br>(mg/L)        | 1.10<br>(0.94-1.30) | 1.94<br>(1.43-2.25) | <0.0001 | 1.10<br>(0.95-1.32) | 1.89<br>(1.10-2.15) | 0.026   | 1.10<br>(0.89-1.32) | 1.92<br>(1.12-2.29) | 0.003   |
| Cystatin C peak<br>value (mg/L)   | 1.75<br>(1.28-2.87) | 2.25<br>(1.94-3.39) | 0.031   | 1.78<br>(1.30-3.08) | 1.94<br>(1.63-2.65) | 0.73    | 1.77<br>(1.30-3.03) | 1.94<br>(1.44-3.08) | 0.44    |
| NT-proBNP day 1<br>(ng/L)         | 452<br>(196-1050)   | 310<br>(126-2208)   | 0.70    | 448<br>(196-968)    | 464<br>(106-1565)   | 0.78    | 318<br>(180-790)    | 1315<br>(345-2991)  | 0.017   |
| NT-proBNP peak<br>value (ng/L)    | 914<br>(412-2445)   | 4020<br>(670-8003)  | 0.025   | 938<br>(412-2735)   | 1545<br>(601-5143)  | 0.28    | 883<br>(392-2430)   | 2370<br>(827-4880)  | 0.021   |
| Troponin I day 1<br>(ng/L)        | 15<br>(8-36)        | 30<br>(12-66)       | 0.15    | 18<br>(9-38)        | 13<br>(9-61)        | 0.93    | 15<br>(8-36)        | 23<br>(9-70)        | 0.28    |
| Troponin I peak<br>(ng/L)         | 23<br>(11-84)       | 108<br>(22-142)     | 0.040   | 24<br>(11-86)       | 33<br>(10-121)      | 0.63    | 23<br>(11-83)       | 53<br>(10-127)      | 0.26    |

## BLOOD CELL COUNTS

### ICU peak values

| Analyte                                 | IgM                 |                     |         | IgG                 |                     |         | IgA                 |                     |         |
|-----------------------------------------|---------------------|---------------------|---------|---------------------|---------------------|---------|---------------------|---------------------|---------|
|                                         | Pos<br>n =103       | Neg<br>n = 12       | P value | Pos<br>n = 98       | Neg<br>n = 17       | P value | Pos<br>n =96        | Neg<br>n = 19       | P value |
| Leukocyte count<br>peak value (*109/L)  | 13.4<br>(9.9-19.4)  | 15.3<br>(13.5-16.7) | 0.56    | 13.7<br>(9.9-20.2)  | 13.8<br>(7.8-15.8)  | 0.28    | 13.5<br>(9.9-20.6)  | 14.1<br>(11.9-15.7) | 0.55    |
| Neutrophil count<br>peak value (*109/L) | 8.0<br>(5.7-10.6)   | 7.6<br>(4.2-13.8)   | 0.74    | 8.0<br>(5.7-11.1)   | 6.4<br>(3.6-10.8)   | 0.22    | 7.9<br>(5.7-11.1)   | 8.0<br>(5.2-9.4)    | 0.52    |
| Eosinophil count<br>peak value (*109/L) | 0.16<br>(0.03-0.30) | 0.03<br>(0.02-0.24) | 0.30    | 0.16<br>(0.04-0.32) | 0.03<br>(0.02-0.09) | 0.014   | 0.17<br>(0.05-0.34) | 0.03<br>(0.02-0.09) | 0.002   |

|                                  |             |             |      |             |             |       |             |             |       |
|----------------------------------|-------------|-------------|------|-------------|-------------|-------|-------------|-------------|-------|
| Basophil count                   | 0.03        | 0.03        | 0.40 | 0.03        | 0.03        | 0.078 | 0.04        | 0.02        | 0.005 |
| peak value (*10 <sup>9</sup> /L) | (0.02-0.07) | (0.01-0.06) |      | (0.02-0.07) | (0.01-0.04) |       | (0.02-0.07) | (0.01-0.03) |       |
| Monocyte count                   | 0.60        | 0.70        | 0.95 | 0.60        | 0.50        | 0.50  | 0.60        | 0.50        | 0.37  |
| peak value (*10 <sup>9</sup> /L) | (0.40-1.10) | (0.25-1.30) |      | (0.40-1.10) | (0.28-1.05) |       | (0.40-1.10) | (0.28-1.03) |       |

Data are expressed as median (interquartile range, IQR). Statistically significant (p<0.05) differences between groups are marked in red. Antibody pos: Antibody positive before ICU discharge. Day 1: First day after ICU admission. Peak value: Highest value during ICU admission. CRP: C-reactive protein. IL-6: Interleukine 6. NT-proBNP: NT-pro-brain natriuretic peptide.

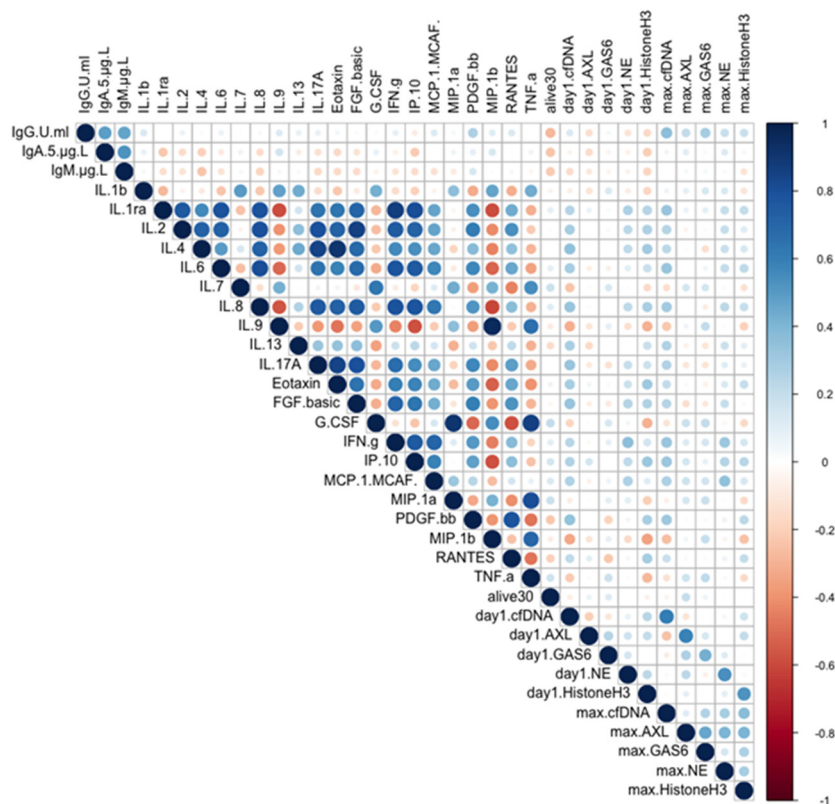

Correlations (Spearman-rank) of cytokine concentration in plasma at admission to ICU with concentration of IgM, IgA and IgG in plasma at the end of the stay in the ICU in critically ill COVID-19 patients. Blue colour indicates a positive correlation and red colour a negative correlation. The size of the symbol illustrates the strength of the correlation, a stronger relationship is indicated by a larger symbol. (IL = interleukin, TNF.a = tumour necrosis factor, IL-1ra = IL-1 re-ceptor antagonist, IP-10=interferon gamma-induced protein 10, G-CSF= granulocyte colony stimulating factor, MCP-1 = monocyte chemoattractant protein-1, MIP = Macrophage inflammatory protein, RANTES =Regulated upon Activation, Normal T Cell Expressed and Presumably Secreted, FGF = Fibroblast Growth Factor, PDGF = Platelet Derived Growth Factor and IFN =interferon).

## References

[1] Lipcsey M, Persson B, Eriksson O, Blom AM, Fromell K, Hultström M, et al. The Outcome of Critically Ill COVID-19 Patients Is Linked to Thromboinflammation Dominated by the Kallikrein/Kinin System. *Frontiers in immunology*. 2021;12:627579.
